# Supplementary material for: A Pilot Study towards the Impact of Type 2 Diabetes on the Expression and Activities of Drug Metabolizing Enzymes and Transporters in Human Duodenum
Source: PubMed Central journal article supplement (PMC6651059; doi:10.3390/ijms20133257), 2019-07-02
Supplement: ijms-20-03257-s001.pdf [file ijms-20-03257-s001.pdf]

## Appendix I: Method details

**Quantification of Intestinal CYP450 mRNAs.** For each participant, two biopsies ( $\approx 10$  mg of tissues) were homogenized in 1 mL of TRIzol® and incubated for 5 min at room temperature. Chloroform (200  $\mu$ l) was added, the mixture shaken for 15 sec and then, centrifuged at 16,000 g for 30 min at 4°C. The aqueous supernatant (500  $\mu$ l) was transferred and ethanol 70% was added (1:1 v/v). RNA was extracted using the Qiagen kit (RNeasy Mini kit; Qiagen Sciences, MD, USA) according to the manufacturer's recommendations. RNA concentration and quality were assessed by spectrometry. Total RNA (2  $\mu$ g) from each sample was used for reverse transcription as described previously and resulting cDNA was kept at -80°C until use.<sup>12</sup> Real-time quantitative PCR was performed using TaqMan® probe and primer sets from Applied Biosystem (Foster, CA, USA) on a QuantStudio 6 Flex System (Life Technologies Inc., Burlington, ON, Canada) as detailed elsewhere.<sup>12</sup> The analysed drug metabolizing enzymes and transporters were: CYP1A1 (Hs01054796\_g1), CYP2B6 (Hs04183483\_g1), CYP2C8 (Hs00946140\_g1), CYP2C9 (Hs00426397\_m1), CYP2C19 (Hs00426380\_m1), CYP2D6 (Hs02576167\_m1), CYP2E1 (Hs00559368\_m1), CYP2J2 (Hs00951113\_m1), CYP3A4 (Hs00604506\_m1), CYP3A5 (Hs01070905\_m1) CES-1 (Hs00275607\_m1), CES-2 (Hs01077945\_m1) ABCB1 (Hs00184500\_m1) ABCG2 (Hs01053790\_m1) OATP2B1 (Hs01030343\_m1). GAPDH (Mm99999915\_g1) and NUP214 (Hs01090093\_m1) were used as housekeeping genes and villin (Hs00200229\_m1) as a calibrator. The relative quantification of various gene expression was calculated with the comparative CT method using the formula  $2^{-\Delta CT}$ .<sup>38</sup> All measured mRNA levels were within the quantifiable range (CT values <35). In addition, mRNA levels associated with the expression of each CYP450 isoenzymes between our two study groups were determined using a calibrator and the following formula:  $2^{-\Delta\Delta CT}$ .<sup>38,39</sup>

**CYP450 genotype analysis.** Blood samples for genotyping were kept at room temperature and DNA was extracted from leukocytes according to standard procedures within seven days using the GenElute™ Blood Genomic DNA kit (Sigma Aldrich, Oakville, Can). Resulting purified genomic DNAs were stored at -20°C until genotyping procedures for major CYP450 isoforms were performed. Variants for the isoenzymes *CYP2B6*, *CYP2C9*, *CYP2J2* and *CYP3A4/5* were detected using the Taqman® qRT-PCR SNP Genotyping Assay (Life Technologies, Burlington, Can). The PCR assay was performed and analysed using the QuantStudio™ 6 Flex System (Life Technologies, Burlington, Can). The SNP Genotyping assay was completed using specific probes for all SNPs (Life Technologies, Burlington, Can). Tested SNPs for *CYP2B6* were \*5 (rs3211371) and \*9 (rs3745274) using specific probes C\_30634242\_40 and C\_7817765\_60, respectively. Two SNPs for *CYP2C9* were considered using specific probes: *CYP2C9*\*2 (rs1799853; C\_25625805\_10) and *CYP2C9*\*3 (rs1057910; C\_27104892\_10). Presence of *CYP2J2*\*6 (rs72547598) and *CYP2J2*\*7 (rs890293) were verified using specific probes C\_27859821\_10 and C\_9581699\_80. The tested SNP for the isoform *CYP3A4* was *CYP3A4*\*22 (rs35599367) with specific probe C\_59013445\_10. For *CYP3A5*, presence of two SNPs were tested; *CYP3A5*\*3 (rs776746) and *CYP3A5*\*6 (rs10264272). The specific probes used were C\_26201809\_30 and C\_30203950\_10, respectively.

## Appendix II:

A

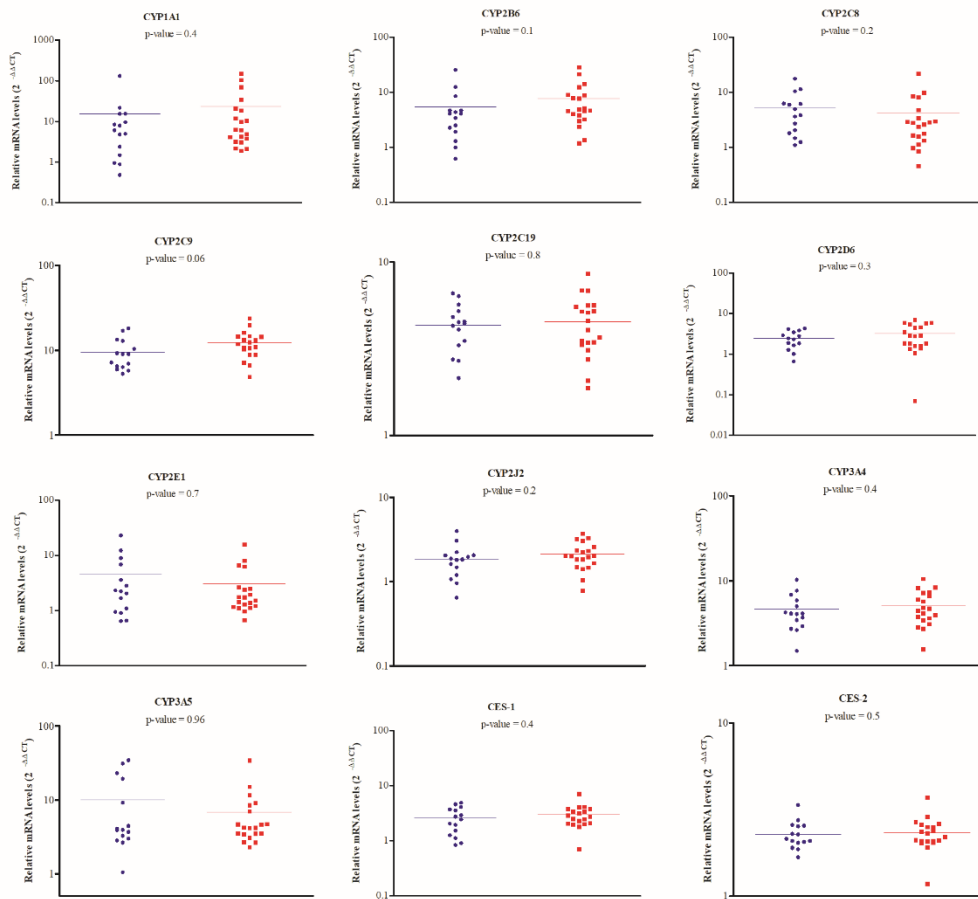

B

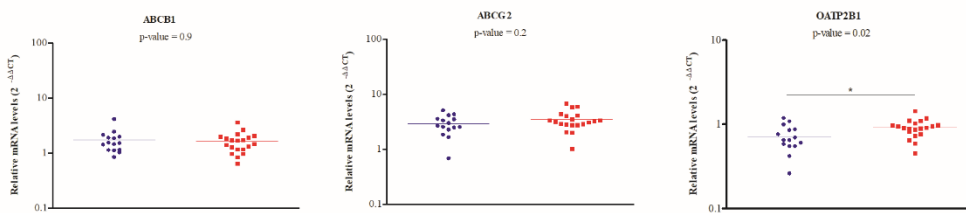

Figure S1. Quantified mRNA transcript levels expressed as N-fold differences relative to the average expression of housekeeping genes and calibrator ( $2^{-\Delta\Delta CT}$ ) for (A) all drug metabolizing enzyme proteins and (B) all drug transporters in patients with T2D (red squares ■) versus non-diabetic controls (blue circles ●). Each experiment was performed three times in triplicates, means are displayed for all individuals and Mann Whitney t-test was performed on overall mean values.

### Appendix III:

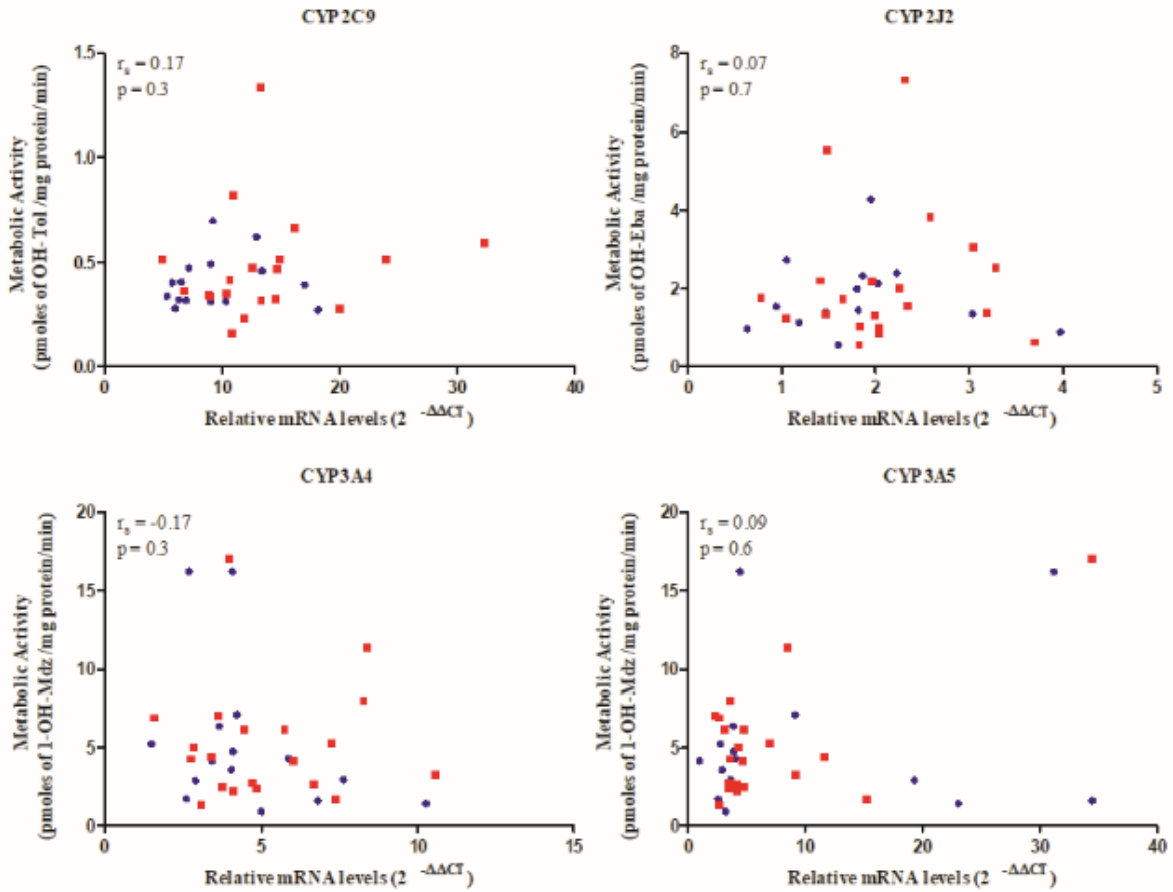

Figure S2. Correlations between mRNA expression levels as N-fold differences relative to the average expression of housekeeping genes and calibrator ( $2^{-\Delta\Delta CT}$ ) and metabolic activities expressed as metabolite formation rates (pmoles mg protein<sup>-1</sup> min<sup>-1</sup>) in both study groups for CYP2C9 (OH-Tol), CYP2J2 (OH-Eba), CYP3A4 and CYP3A5 (1-OH-Mdz). Patients with T2D are displayed with red squares (■) and non-diabetic controls are blue circles (●). Spearman's rank correlation coefficient ( $r_s$ ) and respective p-values are provided on each graph.

#### Appendix IV:

Table S1. Correlation between proinflammatory cytokine levels and CYP450 activities

| Isozymes | Proinflammatory cytokines | Correlation coefficient (r <sub>s</sub> ) | p-value |
|----------|---------------------------|-------------------------------------------|---------|
| CYP2C9   | IFN- $\gamma$             | - 0.09                                    | 0.6     |
|          | IL-1 $\beta$              | - 0.06                                    | 0.7     |
|          | IL-6                      | 0.10                                      | 0.6     |
|          | TNF- $\alpha$             | 0.12                                      | 0.5     |
| CYP2J2   | IFN- $\gamma$             | - 0.10                                    | 0.6     |
|          | IL-1 $\beta$              | 0.21                                      | 0.2     |
|          | IL-6                      | - 0.04                                    | 0.8     |
|          | TNF- $\alpha$             | 0.01                                      | 0.9     |
| CYP3A    | IFN- $\gamma$             | - 0.19                                    | 0.3     |
|          | IL-1 $\beta$              | 0.10                                      | 0.6     |
|          | IL-6                      | - 0.19                                    | 0.3     |
|          | TNF- $\alpha$             | 0.05                                      | 0.8     |

r<sub>s</sub>, Spearman's rank correlation coefficient; IFN- $\gamma$ , interferon-gamma; IL-1 $\beta$ , interleukine-1 beta; IL-6, interleukine-6; TNF- $\alpha$ , tumour necrosis factor alpha

## Appendix V:

Table S2. Correlation between CYP450 activities and T2D-related and demographic covariables.

| Isozymes | Covariables | Correlation coefficient<br>( $r_s$ ) | p-value |
|----------|-------------|--------------------------------------|---------|
| CYP2C9   | Glycemia    | 0.32                                 | 0.06    |
|          | HbA1c       | 0.35                                 | 0.04    |
|          | HOMA-IR     | 0.07                                 | 0.67    |
|          | Insulinemia | 0.02                                 | 0.90    |
|          | Age         | 0.14                                 | 0.43    |
|          | BMI         | 0.12                                 | 0.48    |
| CYP2J2   | Glycemia    | 0.03                                 | 0.86    |
|          | HbA1c       | 0.05                                 | 0.77    |
|          | HOMA-IR     | 0.09                                 | 0.59    |
|          | Insulinemia | 0.13                                 | 0.44    |
|          | Age         | 0.01                                 | 0.97    |
|          | BMI         | - 0.07                               | 0.67    |
| CYP3A    | Glycemia    | 0.18                                 | 0.30    |
|          | HbA1c       | 0.12                                 | 0.50    |
|          | HOMA-IR     | 0.24                                 | 0.15    |
|          | Insulinemia | 0.29                                 | 0.09    |
|          | Age         | - 0.04                               | 0.82    |
|          | BMI         | - 0.12                               | 0.47    |

$r_s$ ; Spearman's rank correlation coefficient

Correlation of glycemia ( $\text{mmol L}^{-1}$ ), HbA1c (% glycated haemoglobin), HOMA-IR (homeostatic model assessment of insulin resistance), insulinemia ( $\text{pmol L}^{-1}$ ), Age (years) and BMI (body mass index in  $\text{kg m}^{-2}$ ) with CYP450s metabolic activity (rates of pathway-specific metabolite formation in  $\text{pmoles mg protein}^{-1} \text{min}^{-1}$ ) for CYP2C9 (Tolbutamide  $\rightarrow$  Hydroxytolbutamide), CYP2J2 (Ebastine  $\rightarrow$  Hydroxyebastine) and CYP3A (Midazolam  $\rightarrow$  1'-Hydroxymidazolam)

## Appendix VI:

Table S3. Influence of time since diagnostic of T2D on metabolic activity of CYP2C9, CYP2J2 and CYP3A.

| Time since diagnostic<br>(years) | Metabolic activity<br>(pmoles mg protein <sup>-1</sup> min <sup>-1</sup> ) | p-value |
|----------------------------------|----------------------------------------------------------------------------|---------|
| <b>CYP2C9</b>                    |                                                                            |         |
| < 5 (n=4)                        | 0.37 ± 0.10                                                                | 0.5     |
| 5 to 10 (n=6)                    | 0.47 ± 0.20                                                                |         |
| > 10 (n=9)                       | 0.53 ± 0.34                                                                |         |
| <b>CYP2J2</b>                    |                                                                            |         |
| < 5 (n=4)                        | 1.41 ± 0.63                                                                | 0.5     |
| 5 to 10 (n=7)                    | 2.63 ± 2.20                                                                |         |
| > 10 (n=9)                       | 2.13 ± 1.61                                                                |         |
| <b>CYP3A</b>                     |                                                                            |         |
| < 5 (n=4)                        | 3.75 ± 1.61                                                                | 0.4     |
| 5 to 10 (n=7)                    | 5.43 ± 5.32                                                                |         |
| > 10 (n=9)                       | 5.79 ± 3.03                                                                |         |

Values of metabolic activities are presented as mean ± SD

p-values for Kruskal-Wallis test are reported

Influence of time since diagnostic (years) on CYP450s metabolic activity (rates of pathway-specific metabolite formation in pmoles mg protein<sup>-1</sup> min<sup>-1</sup>) for CYP2C9 (Tolbutamide → Hydroxytolbutamide), CYP2J2 (Ebastine → Hydroxyebastine) and CYP3A (Midazolam → 1'-Hydroxymidazolam)

## Appendix VII:

Table S4. Qualitative analysis of the influence of genetic variants on metabolic activity in overall study population.

| <b>Genetic Variant</b>                   | <b>Metabolic activity</b><br>(pmoles mg protein <sup>-1</sup> min <sup>-1</sup> ) |
|------------------------------------------|-----------------------------------------------------------------------------------|
| <i>CYP2C9</i>                            |                                                                                   |
| <i>CYP2C9</i> *1/*1 (n=24)               | 0.46 ± 0.24                                                                       |
| <i>CYP2C9</i> *1/*2 (n=6)                | 0.47 ± 0.17                                                                       |
| <i>CYP2C9</i> *1/*3 (n=3)                | 0.38 ± 0.09                                                                       |
| <i>CYP2C9</i> *2/*2 and *3/*3 (n=2)      | 0.32 ± 0.06                                                                       |
| <i>CYP2J2</i>                            |                                                                                   |
| <i>CYP2J2</i> *1/*1 (n=32)               | 2.07 ± 1.45                                                                       |
| <i>CYP2J2</i> *1/*7 (n=4)                | 1.04 ± 0.40                                                                       |
| <i>CYP3A4</i>                            |                                                                                   |
| <i>CYP3A4</i> *1/*1 (n=33)               | 5.35 ± 4.28                                                                       |
| <i>CYP3A4</i> *1/*22 (n=3)               | 2.97 ± 0.32                                                                       |
| <i>CYP3A5</i>                            |                                                                                   |
| Expressers: *1/*1, *1/*3 and *1/*6 (n=6) | 6.01 ± 5.38                                                                       |
| Non-expressers: *3/*3 (n=30)             | 4.98 ± 3.95                                                                       |

No statistical analysis was performed due to the small number of subjects with variant alleles.

Reported metabolic activities are rates for pathway-specific metabolite formation (pmoles mg protein<sup>-1</sup> min<sup>-1</sup>) for CYP2C9 (Tolbutamide → Hydroxytolbutamide), CYP2J2 (Ebastine → Hydroxyebastine) and CYP3A (Midazolam → 1'-Hydroxymidazolam)
